# Supplementary material for: Evaluation of the Treatment Effect of Aloe vera Fermentation in Burn Injury Healing Using a Rat Model
Source: Hindawi journal article supplement (doi:10.1155/2019/2020858), 2019-01-27
Supplement: f1 [file 2020858.f1.pdf]

**Table S1** Number of raw tags, clean tags, effective tags AvgLen and OTUs in groups C, M 393 AFB and BC by high-throughput sequencing.

| Sample name | Raw Tags | Clean Tags | Effective Tags | AvgLen(bp) | OTU_Num |
|-------------|----------|------------|----------------|------------|---------|
| AFB1        | 70663    | 59603      | 59457          | 415        | 629     |
| AFB2        | 70424    | 59510      | 57916          | 417        | 645     |
| AFB3        | 71670    | 61396      | 59010          | 413        | 566     |
| AFB4        | 71349    | 60523      | 59519          | 414        | 679     |
| BC1         | 70497    | 59358      | 58706          | 415        | 675     |
| BC2         | 71869    | 61554      | 59130          | 412        | 651     |
| BC3         | 71001    | 60067      | 59976          | 416        | 640     |
| C1          | 71638    | 60634      | 60432          | 415        | 642     |
| C2          | 71183    | 60309      | 60242          | 413        | 531     |
| C3          | 70980    | 60583      | 60350          | 412        | 631     |
| M1          | 70342    | 58341      | 56998          | 418        | 674     |
| M2          | 70050    | 58304      | 57296          | 418        | 664     |
| M3          | 71206    | 59936      | 59414          | 415        | 410     |
| Total       | 994542   | 780118     | 768446         | 5393       | 8037    |
| Average     | 76503.23 | 60009.07   | 59111.23       | 414.84     | 618.23  |
